# Supplementary material for: Comparative Study of Cytotoxic and Membranotropic Properties of Betulinic Acid-F16 Conjugate on Breast Adenocarcinoma Cells (MCF-7) and Primary Human Fibroblasts
Source: MDPI journal article supplement (doi:10.3390/biomedicines10112903), 2022-11-11
Supplement: s1 [file s1]

## Supplementary Materials

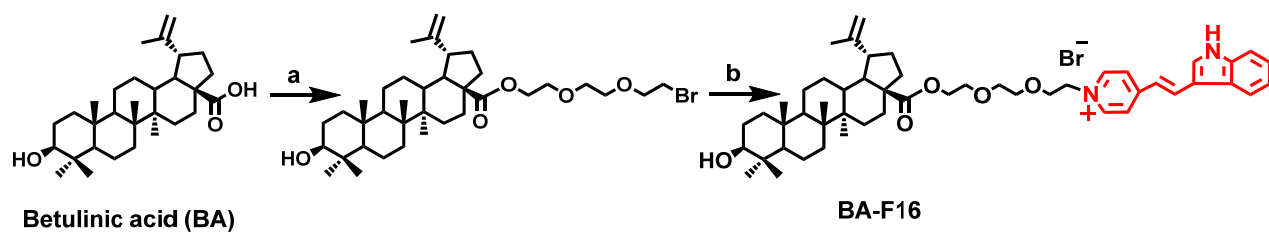

**Figure S1.** Synthesis of conjugate **BA-F16**. Reagents and conditions: **a** tri(ethylene glycol) dibromide,  $K_2CO_3$ , DMF, 50 °C, 2h; **b** (E)-4-(2-(1H-indol-3-yl)vinyl)pyridine, DMF, 85 °C, Ar, 12 h.

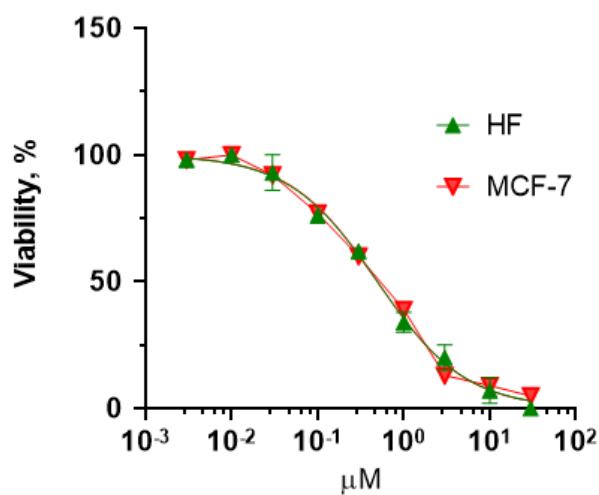

**Figure S2.** Viability of MCF-7 and HF cells after 48 hours treatment with doxorubicin. Cytotoxicity was assessed 48 h after the addition of substances by crystal violet indicator. Data (mean  $\pm$  SEM) of 4 independent experiments are shown.

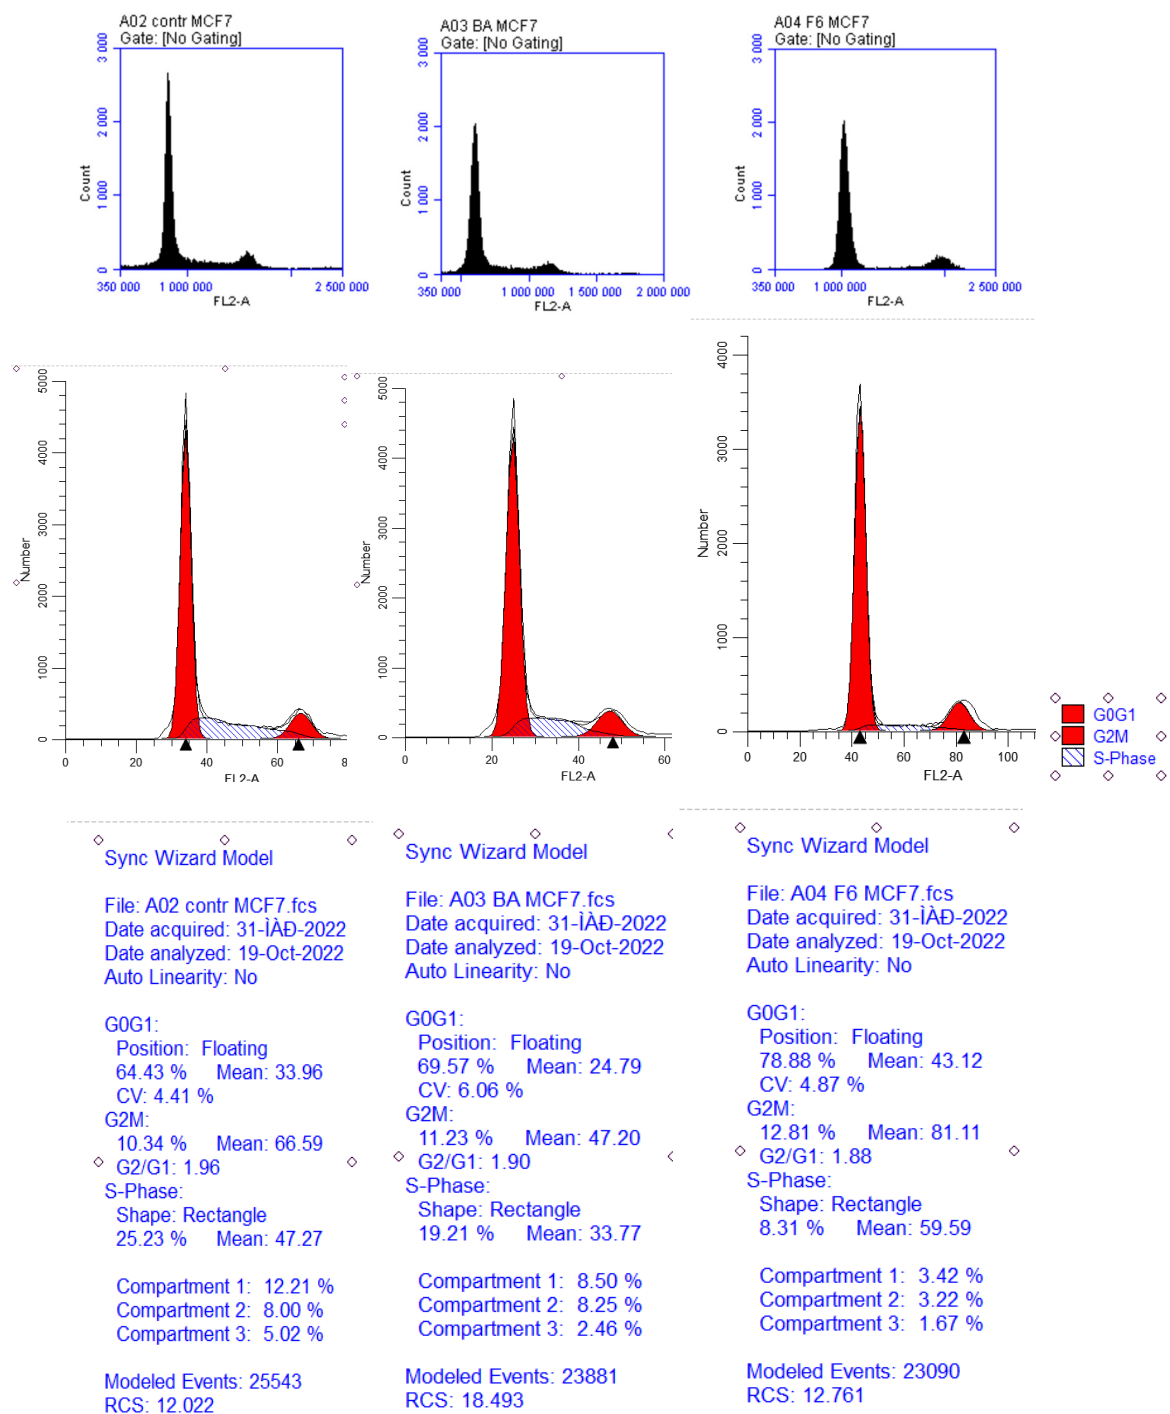

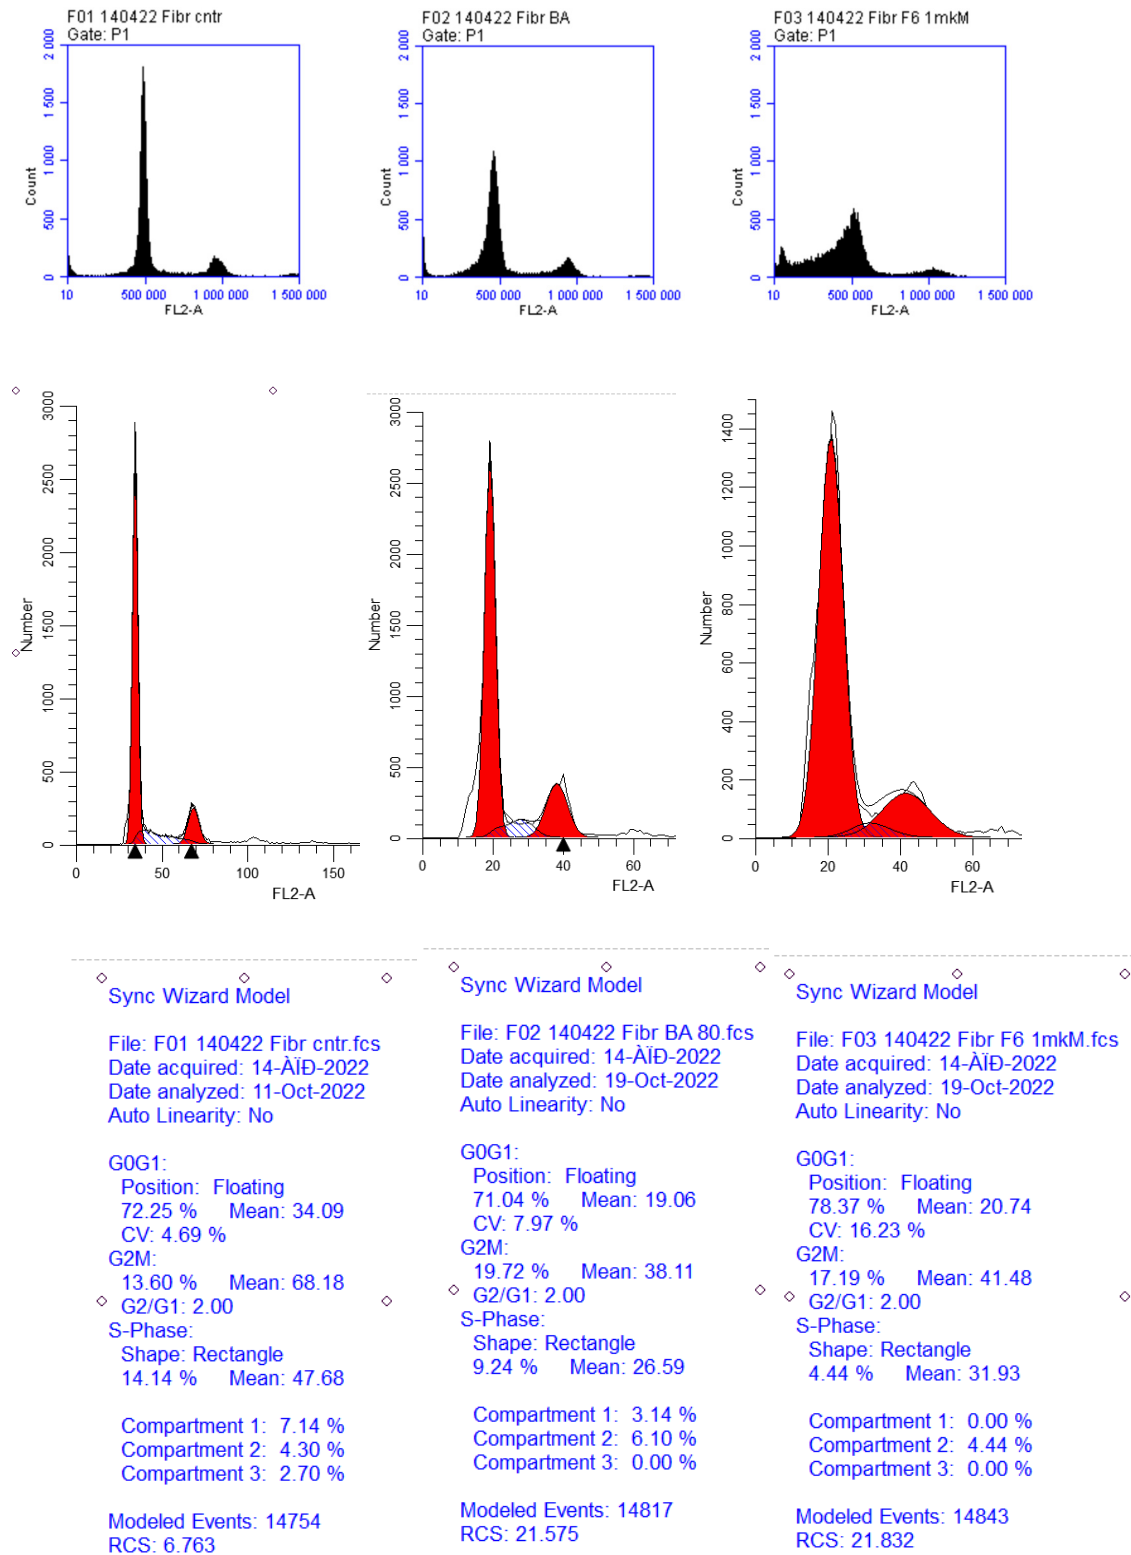

**Figure S4.** HF cell cycle analysis after 24-h incubation with BA (5  $\mu$ M) and BA-F16 (1  $\mu$ M). Results shown are one of three independent experiments conducted. Upper panel – representative figures of cell cycle distribution (G0/G1, S, and G2/M). Bottom panel – results of cell cycle distribution evaluated using ModFit LT 4.1 software. In the figure, the designation F6 corresponds to the BA-F16 conjugate.
